# Supplementary material
Source: Royal Society of Chemistry journal article supplement (doi:10.1039/d6mh00152a)
Supplement: d6mh00152a1.pdf [file d6mh00152a1.pdf]

## Supporting Information

# Atomically Dispersed Ru on Defective CdS for Photocatalytic Solar Fuel Production Coupled with Hydrazine Degradation

Zikang Zeng,<sup>a</sup> Siyu Kang,<sup>a</sup> Xiaohe Jiang,<sup>a</sup> Hai Qiu,<sup>b</sup> Yu-Chia Chang,<sup>c</sup> Yu-Ting Chueh,<sup>c</sup> Lan Yuan,<sup>\*b</sup> Yujun Liang,<sup>a</sup> Jianguo Chang,<sup>\*d</sup> Gui Yang,<sup>e</sup> Sung-Fu Hung<sup>\*c</sup> and Chuang Han<sup>\*a</sup>

<sup>a</sup> Faculty of Materials Science and Chemistry, China University of Geosciences, Wuhan 430074, China

<sup>b</sup> Key Laboratory of Hubei Province for Coal Conversion and New Carbon Materials, Wuhan University of Science and Technology, Wuhan 430081, China

<sup>c</sup> Department of Applied Chemistry, National Yang Ming Chiao Tung University, Hsinchu 300, Taiwan

<sup>d</sup> Faculty of Anhui Key Laboratory of Green Carbon Chemistry, Fuyang Normal University, Fuyang 236037, China

<sup>e</sup> Faculty of Environmental Science and Engineering, Kunming University of Science and Technology, Kunming 650500, China

\*Corresponding Author: yuanlan@wust.edu.cn (Lan Yuan); jgchang@fynu.edu.cn (Jianguo Chang); sungfuhung@nycu.edu.tw (Sung-Fu Hung); hanc@cug.edu.cn (Chuang Han)

## Contents list:

### Experimental Section

- Fig. S1.** (a, b) SEM images of  $(\text{Cd}(\text{S}_2\text{CNET}_2)_2)$ .
- Fig. S2.** SEM image of (a) pure CdS, (b) CdS-Ru<sub>0.017</sub>, (c) CdS-Ru<sub>0.089</sub>, (d) CdS-Ru<sub>0.18</sub>, (e) CdS-Ru<sub>0.31</sub>, and (f) CdS-Ru<sub>0.57</sub>.
- Fig. S3.** (a) HAADF-STEM image, (b-d) elemental mapping profiles of CdS-Ru<sub>0.089</sub> sample.
- Fig. S4.** (a) HAADF-STEM image, (b-f) face-scan elemental mapping profiles and (g) line-scan elemental mapping profiles of CdS-Ru<sub>0.57</sub> sample.
- Fig. S5.** XRD patterns of CdS and CdS-Ru.
- Fig. S6.** (a) XRD pattern and (b) detail diagram of CdS-Ru with different Ru loading contents.
- Fig. S7.** XPS spectrum of Ru 3p in CdS-Ru.
- Fig. S8.** H<sub>2</sub> production over CdS-Ru with different Ru loading contents.
- Fig. S9.** H<sub>2</sub> production (a) with different concentrations (wt.%) of hydrazine hydrate, (b) with different mass of catalyst under LED light irradiation.
- Fig. S10.** H<sub>2</sub> production over CdS-Ru with or without light irradiation.
- Fig. S11.** H<sub>2</sub> production of only RuCl<sub>3</sub> and CdS-Ru.
- Fig. S12.** The stability testing of CdS-Ru for photocatalytic H<sub>2</sub> evolution at ambient conditions.
- Fig. S13.** (a) XRD patterns, (b) SEM images and (c) HAADF-STEM images of CdS-Ru before and after reaction.
- Fig. S14.** High-resolution XPS spectra of (a) Cd 3d and (b) S 2p for CdS-Ru before and after reaction.
- Fig. S15.** (a) XANES and (b) EXAFS spectra of CdS-Ru before and after reaction.
- Fig. S16.** H<sub>2</sub> production of Pt or Ru photodeposited on CdS and CdS-Ru.
- Fig. S17.** H<sub>2</sub> production of CdS-Ru under different sacrificial agents.
- Fig. S18.** H<sub>2</sub> production of CdS-Ru under outdoor sunlight, LED lamp or 300 W Xe lamp irradiation.
- Fig. S19.** Digital photo of photocatalytic H<sub>2</sub> production over CdS-Ru.
- Fig. S20.** (a) Photography of reaction set-up. Calibration curves for the determination of (b) H<sub>2</sub> and (c) N<sub>2</sub>. (d) Time-dependent TCD signal during the reaction over CdS-Ru.
- Fig. S21.** The stability testing of CdS-Ru for photocatalytic CO<sub>2</sub> reduction to CH<sub>3</sub>OH.
- Fig. S22.** Mass spectrometry results of the isotope labeling experiments with <sup>13</sup>CO<sub>2</sub> + H<sub>2</sub>O or <sup>13</sup>CO<sub>2</sub> + D<sub>2</sub>O as the reactant.
- Fig. S23.** UV-vis DRS spectra of CdS and CdS-Ru samples and the corresponding photographs.

**Fig. S24.** PL spectra of CdS and CdS-Ru samples.

**Fig. S25.** EIS spectra of CdS and CdS-Ru tested at (a) 0.3 V, (b) -0.8 V and (c) -0.9 V.

**Fig. S26.** Tafel slope spectra of CdS and CdS-Ru.

**Fig. S27.** The optimized structures of (a) CdS and (b) CdS-Ru during the DFT calculations.

**Fig. S28.** The charge distribution map on the surface of CdS-Ru.

**Fig. S29.** Mott–Schottky plots of (a) CdS and (b) CdS-Ru. (c) Tauc plots of CdS and CdS-Ru.  
(d) Band diagram of CdS, CdS-Ru and hydrazine.

**Fig. S30.** H<sub>2</sub> production in the presence and absence of an electron scavenger.

**Fig. S31.** Free energy profiles for the HER at different sites on the CdS and CdS-Ru.

**Table S1.** The actual content of Ru (wt.%) in different samples.

**Table S2.** Fitting results of EXAFS spectra at Ru K-edge.

**Table S3.** The actual content of Ru (wt.%) in CdS-Ru<sub>0.18</sub> before and after reaction.

**Table S4.** The detailed H<sub>2</sub> evolution experimental conditions of the references cited in Fig. 3d of the main text.

**Table S5.** The detailed CH<sub>3</sub>OH production experimental conditions of the references cited in Fig. 3d of the main text.

**Table S6.** Transient current decay analysis for different samples.

**Table S7.** Spin concentration per unit volume in EPR measurements.

**Equations S1-S6**

**References**

## **Experimental Section**

### **Characterization**

The powder X-ray diffraction (XRD) patterns of the catalysts were obtained using an X-ray diffraction instrument (D8-FOCUS, Bruker, Germany) with Cu-K $\alpha$  radiation ( $\lambda = 1.5418 \text{ \AA}$ ), scanning in the range of  $5^\circ$ - $80^\circ$  at a scanning rate of  $5^\circ/\text{min}$ . The morphology and microstructure of the prepared samples were analyzed using field emission scanning electron microscopy (SEM, Japan SU8010) and transmission electron microscopy (TEM, America G2 T20). High-angle annular dark-field scanning transmission electron microscopy (HAADF-STEM) was conducted using an image- and probe-corrected transmission electron microscope operating at 200 kV (FEI Themis 60–300). X-ray absorption spectroscopy, encompassing X-ray absorption near edge spectra (XANES) and extended X-ray absorption fine structure (EXAFS) for Ru K-edge, was conducted in a fluorescence mode at room temperature at BL-12B2 in SPring-8, NSRRC. Least-squares curve fitting analysis of the EXAFS data was performed using the Artemis program. X-ray photoelectron spectroscopy (XPS) data were acquired using an Al K $\alpha$  excitation source from Thermo Fisher Scientific. UV-vis diffuse reflectance spectra (DRS) were measured in the range of 200-800 nm on a scanning UV-vis spectrophotometer (UV-2550PC, Shimadzu), using BaSO $_4$  as the reflectance standard. Photoluminescence (PL) spectra were obtained using a fluorescence spectrometer (Fluoromax-4P, Horiba Jobin Yvon, New Jersey, USA) equipped with a 150 W Xe lamp as the excitation source, with an excitation wavelength of 375 nm. Photoluminescence decay curves were acquired using a Fluorescence Spectrometer (FLS 980, Edinburgh Instruments, Livingston, UK), with a 405 nm-EPLED as the selected light source. Electron Paramagnetic Resonance (EPR) analysis was performed on a Bruker EMX PLUS (Germany) instrument to characterize the content of surface vacancies ( $V_s$ ) in the materials. The mass fraction of Ru was determined via ICP-MS using an Agilent 7900 instrument; the materials were dissolved in aqua regia and tested after dilution. The in situ Fourier transform infrared (FTIR) spectra were collected on Thermo IS 50 (USA).

### **Photo-electrochemical measurements:**

Photo-electrochemical measurements were collected using a conventional three-electrode electrochemical analyzer (CHI760E, Shanghai). Platinum wire and Ag/AgCl electrodes were used as the counter electrode and reference electrode, respectively. Photocurrent response spectroscopy, linear sweep voltammetry (LSV) curves, open circuit potential, and Mott-Schottky plots were tested using a 0.5 M Na $_2$ SO $_4$  solution. Electrochemical impedance

spectroscopy (EIS) was tested using a  $K_3[Fe(CN)_6]/K_4[Fe(CN)_6]/KCl$  (10 mM/10 mM/0.5 M) solution at 0.3 V, -0.8 V and -0.9 V under Xe lamp irradiation. The working electrode was prepared according to the following method: 5 mg of catalyst powder, 200  $\mu$ L of ethanol, and 20  $\mu$ L of Nafion solution were mixed and subjected to ultrasonic treatment for 30 min. Finally, the resultant catalyst slurry was coated onto the precleaned FTO glass surface with an active area of 1.00 cm  $\times$  1.00 cm and then dried on a 120  $^{\circ}$ C heating stage. For photoelectric current measurements, a 300 W Xe lamp (PLS-SXE 300, Beijing Perfect light Co., Ltd) with a filter ( $\lambda > 420$  nm) served as the light source, and transient photocurrent responses were measured with a 20 s on/off interval at a bias potential of 0.3 V vs. Ag/AgCl. Transient open-circuit voltage measurements used the same light source as the photocurrent tests. Electrochemical impedance spectroscopy was recorded at a potential of 0.3 V vs. Ag/AgCl, and linear sweep voltammetry (LSV) curves were obtained over a bias range of -1.5 V to 1.5 V vs. Ag/AgCl. The Mott-Schottky plots were recorded at a scanning rate of 5 mV/s and a frequency of 1500, 2000 and 2500 Hz. The reference Ag/AgCl electrode was calibrated against a reversible hydrogen electrode (RHE), and all the potentials herein are reported relative to the RHE, per the following equation.

$$E_{RHE} = E_{Ag/AgCl} + 0.197 + 0.0591 \cdot pH$$

Where  $E_{RHE}$  and  $E_{Ag/AgCl}$  are electrode potentials relative to RHE and Ag/AgCl electrode potentials, respectively.

### Apparent quantum efficiency (AQE) calculations

The apparent quantum efficiency of CdS-Ru photocatalyst was determined under Xe lamp irradiation at 400, 420, 500, and 600 nm with bandpass filters.

In the photocatalytic reaction, 5 mg of photocatalyst was added to 10 mL of 2 wt.% hydrazine hydrate. The suspension was then purged with Ar (or CO<sub>2</sub>) gas for 10 min, and irradiated under monochromatic light of different wavelengths for 1 h. The light power density of the Xe lamp was measured using a radiometer and found to be 14.81, 13.45, 16.31, and 16.80 mW $\cdot$ cm<sup>-2</sup> at 400, 420, 500, and 600 nm, respectively, with a controlled illumination area of 1 cm<sup>2</sup>. The AQE at 400, 420, 500, and 600 nm was calculated as 23.88%, 31.79%, 16.73%, and 2.15% according to the following formula:<sup>1</sup>

$$AQE = \frac{\text{number of reacted electrons}}{\text{number of incident photons}} \times 100\% = \frac{n M N_A h C}{S P t \lambda}$$

**n** is the electron transfer constant (n = 2 or 6, respectively for H<sub>2</sub> and methanol production);

**M** represents the mole of produced H<sub>2</sub> or methanol;

$N_A$  is Avogadro's constant ( $6.022 \times 10^{23} \text{ mol}^{-1}$ );  
 $h$  is Planck's constant ( $6.626 \times 10^{-34} \text{ J}\cdot\text{s}$ );  
 $C$  is the speed of light ( $3 \times 10^8 \text{ m/s}$ );  
 $S$  is the irradiation area ( $\text{cm}^2$ );  
 $P$  is the power density of incident monochromatic light ( $\text{W/cm}^2$ );  
 $t$  is the reaction time (s);  
 $\lambda$  is the wavelength of incident monochromatic light (m).

### Computational method

We have employed the Vienna Ab initio Simulation Package (VASP) to perform all density functional theory (DFT) calculations within the generalized gradient approximation (GGA) using the Perdew-Burke-Ernzerhof (PBE) functional.<sup>2-5</sup> We have chosen the projected augmented wave (PAW) potentials to describe the ionic cores and take valence electrons into account using a plane wave basis set with a kinetic energy cutoff of 400 eV. Spin-polarization effect was also considered. The DFT-D3 empirical correction method was employed to describe van der Waals interactions.<sup>6</sup> Geometry optimizations were performed with the force convergence smaller than  $0.05 \text{ eV}/\text{\AA}$ . Gamma Scheme k-points of  $2 \times 2 \times 1$  were applied for all the calculations. All the atoms are relaxed in all the calculations. For Ru-CdS, one Cd in the first layer was replaced by Ru, and one S vacancy was built near Ru according to our experimental observation. The free energy changes ( $\Delta G$ ) of each elementary reaction step during the reaction were calculated using the computational hydrogen electrode (CHE) model. In this model, the chemical potential is equal to the energy of half of the gas-phase  $\text{H}_2$  at 0 V vs the reversible hydrogen electrode (RHE). The Gibbs free energy was calculated by the following equation:

$$\Delta G = \Delta E + \Delta \text{EZPE} - T\Delta S$$

Where the value of  $\Delta E$ ,  $\Delta \text{EZPE}$  and  $\Delta S$  denotes the changes of DFT energy, the zero-point energy and the entropy at 298.15K, respectively.

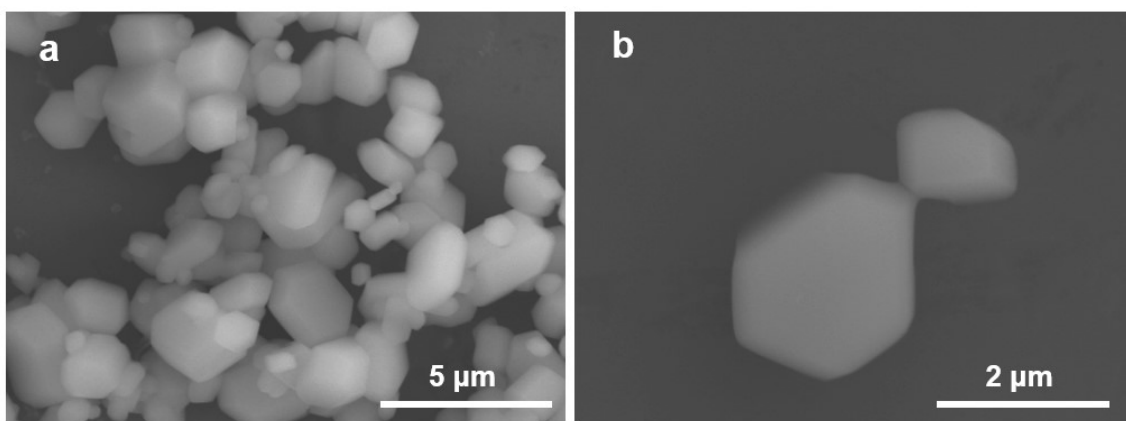

**Fig. S1.** (a, b) SEM images of  $(\text{Cd}(\text{S}_2\text{CNET}_2)_2)$ .

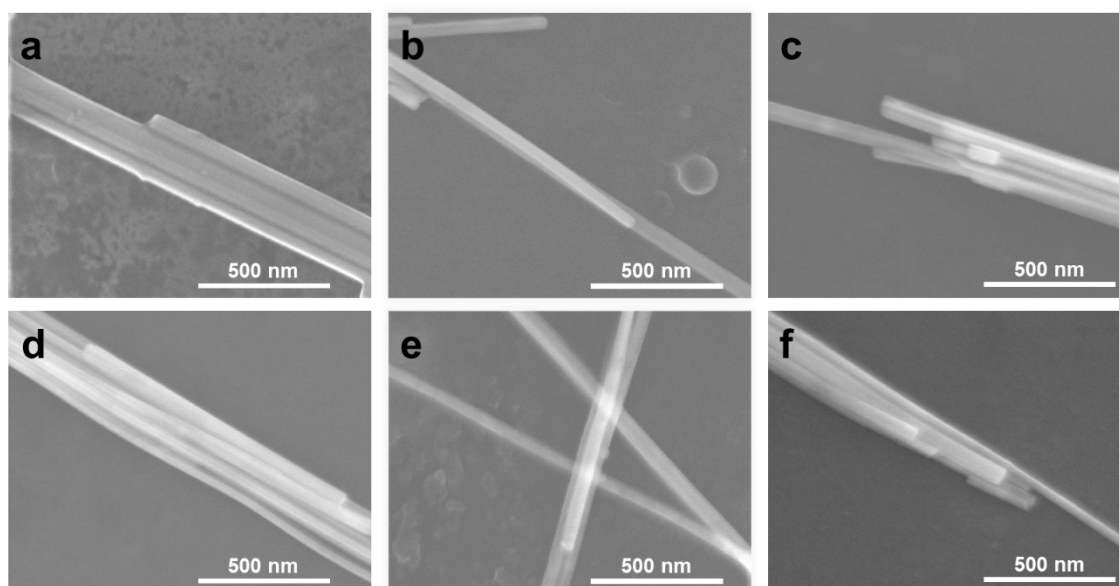

**Fig. S2.** SEM image of (a) pure CdS, (b) CdS-Ru<sub>0.017</sub>, (c) CdS-Ru<sub>0.089</sub>, (d) CdS-Ru<sub>0.18</sub>, (e) CdS-Ru<sub>0.31</sub>, and (f) CdS-Ru<sub>0.57</sub>.

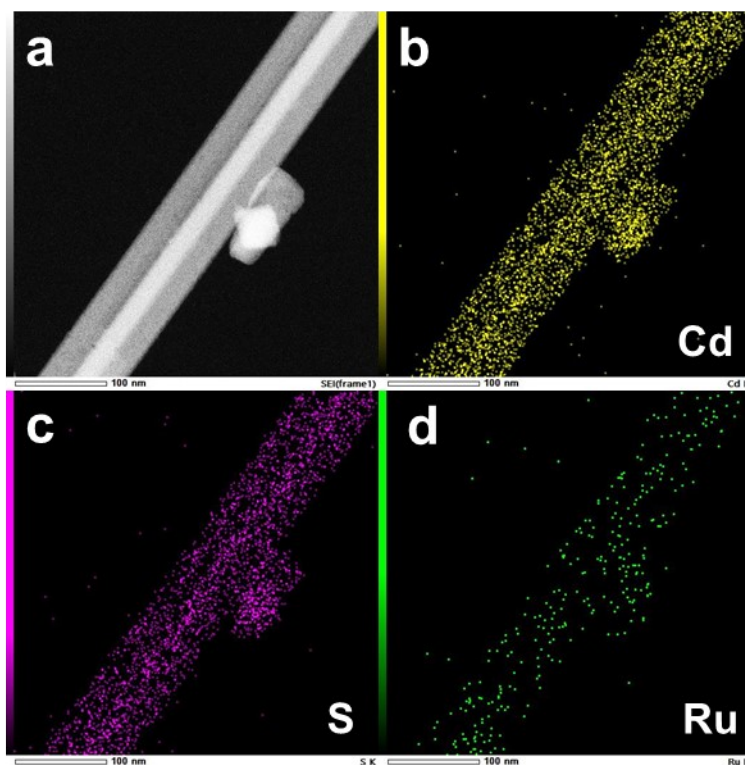

**Fig. S3.** (a) HAADF-STEM image, (b-d) elemental mapping profiles of CdS-Ru<sub>0.089</sub> sample.

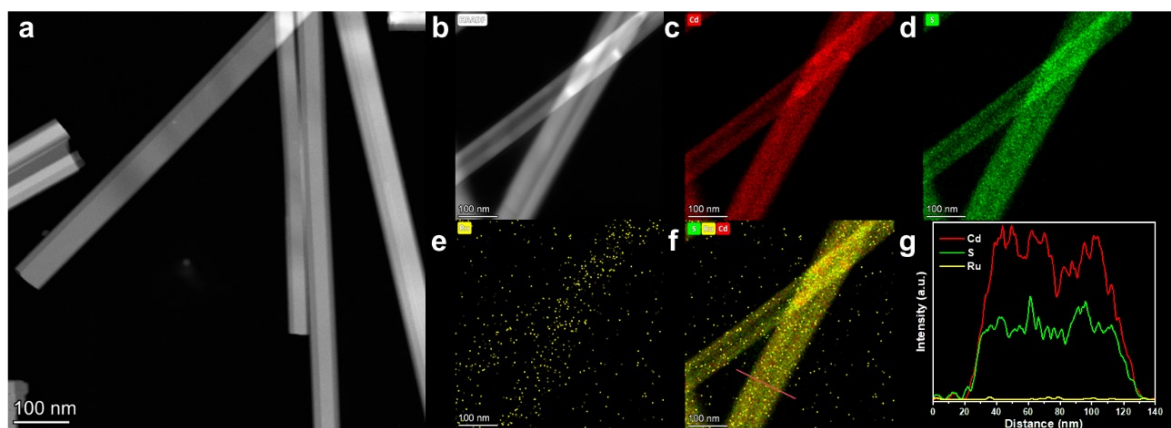

**Fig. S4.** (a) HAADF-STEM image, (b-f) face-scan elemental mapping profiles and (g) line-scan elemental mapping profiles of CdS-Ru<sub>0.57</sub> sample.

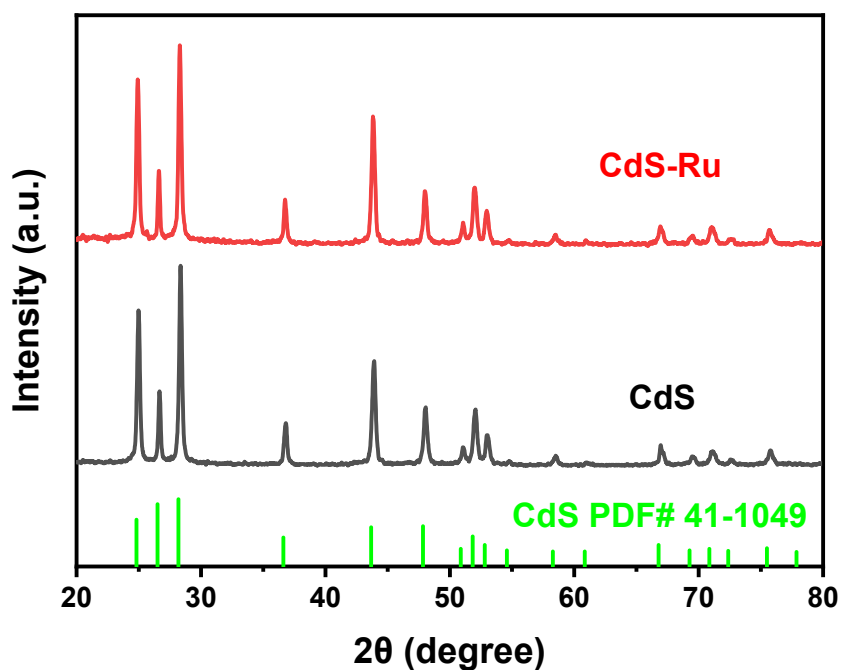

Fig. S5. XRD pattern of CdS and CdS-Ru.

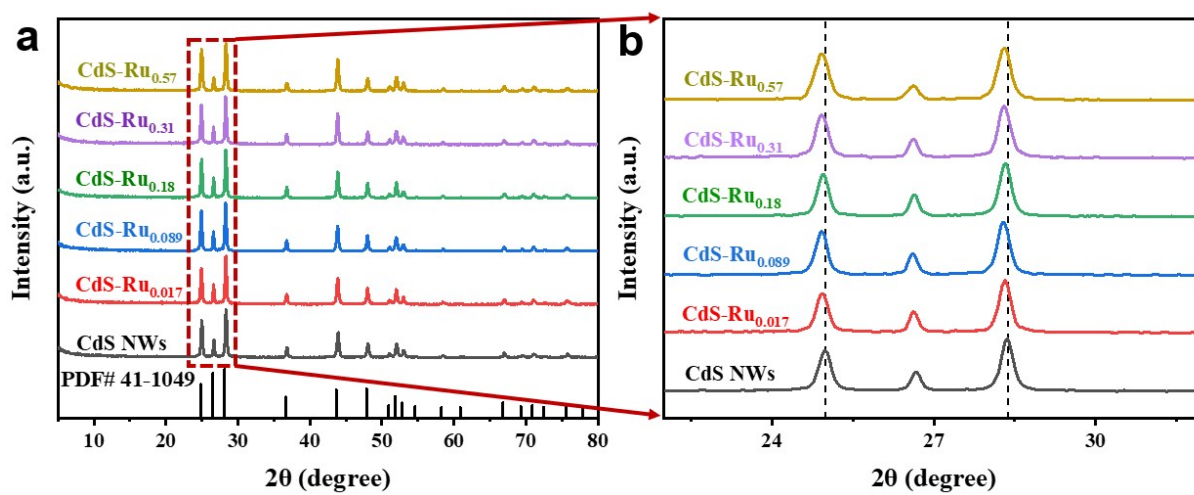

Fig. S6. (a) XRD pattern and (b) detail diagram of CdS-Ru with different Ru loading contents.

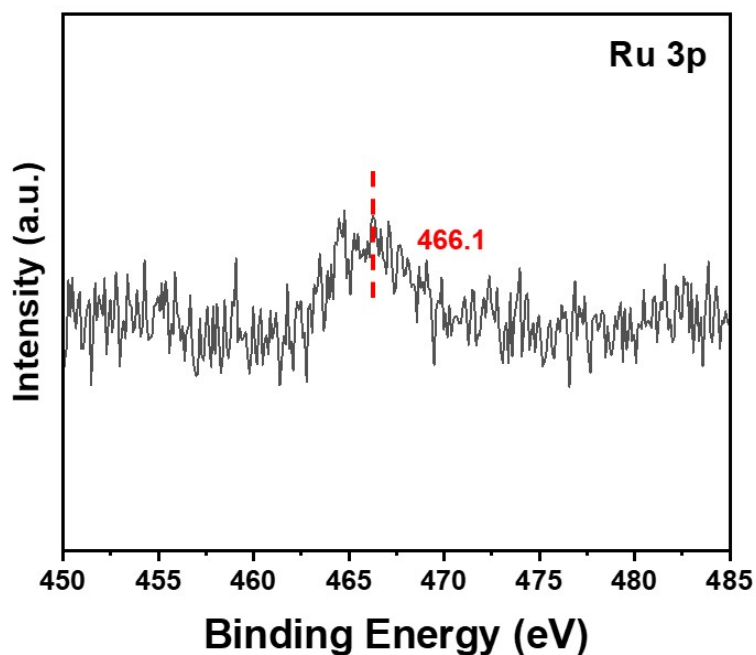

**Fig. S7.** XPS spectrum of Ru 3p in CdS-Ru.

**Note:** The adventitious carbon located at 284.8 eV is used to calibrate samples. The weak intensity of the Ru peak is attributed to its low content.

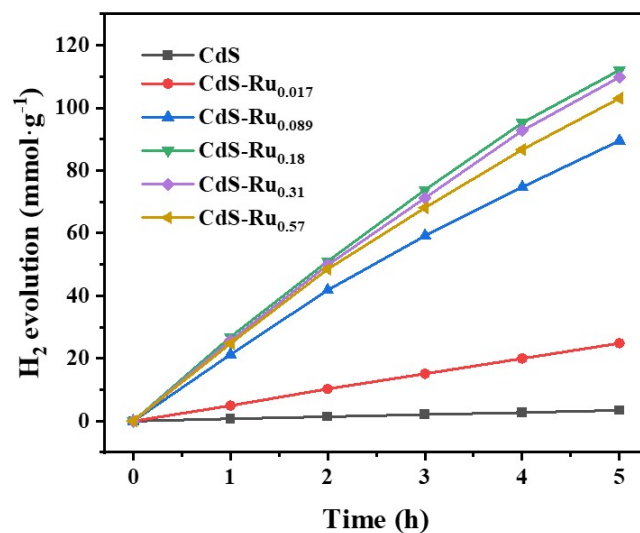

**Fig. S8.** H<sub>2</sub> production over CdS-Ru with different Ru loading contents. Reaction conditions: 5 mg catalyst, 10 mL 1 wt.% hydrazine hydrate, under LED (60 mW cm<sup>-2</sup>, λ > 400 nm) light.

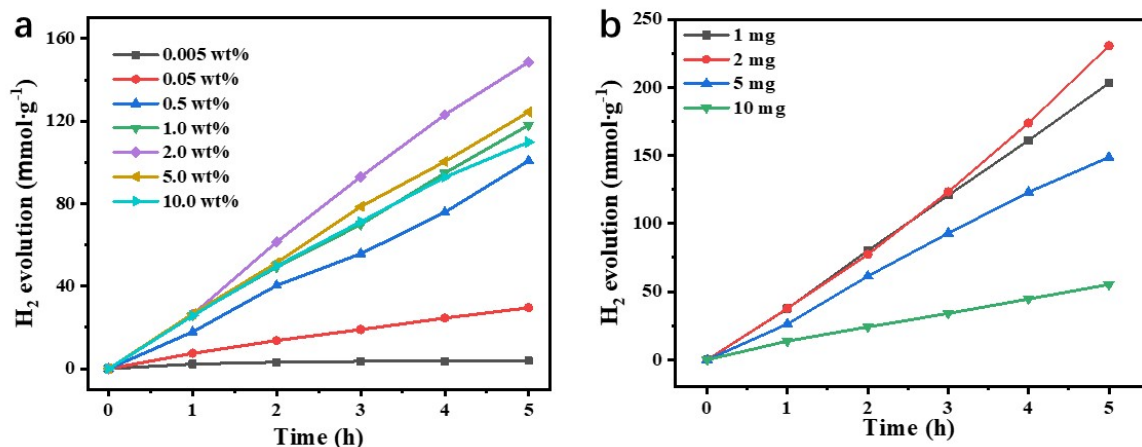

**Fig. S9.** H<sub>2</sub> production (a) with different concentrations (wt.%) of hydrazine hydrate, (b) with different mass of catalyst under LED light irradiation ( $\lambda > 400$  nm, 60 mW cm<sup>-2</sup>).

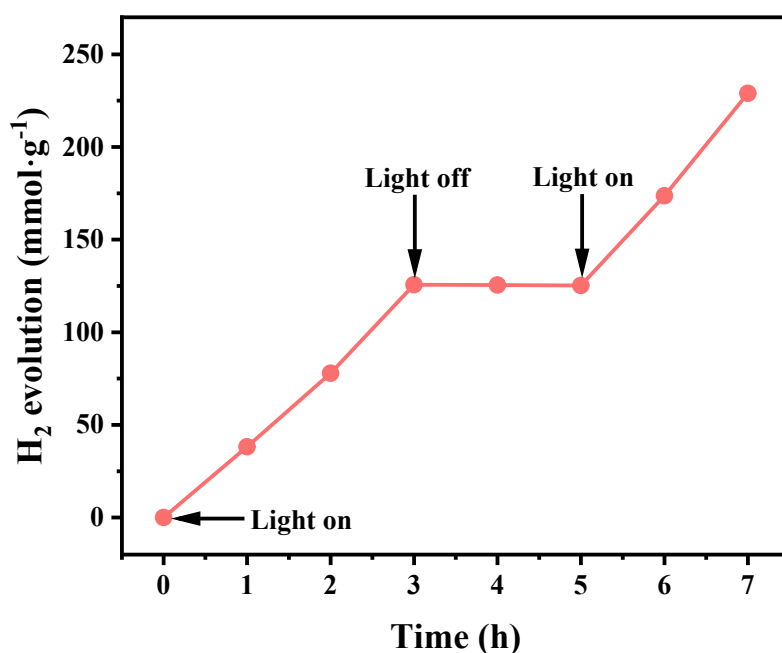

**Fig. S10.** H<sub>2</sub> production over CdS-Ru under with or without light irradiation. Reaction conditions: 2 mg catalyst, 10 mL 2 wt.% hydrazine hydrate, under LED (60 mW cm<sup>-2</sup>,  $\lambda = \lambda > 400$  nm) light.

**Note:** The cessation and subsequent resumption of H<sub>2</sub> generation during turning off and on the light, respectively, indicate that the production of H<sub>2</sub> is triggered by light irradiation.

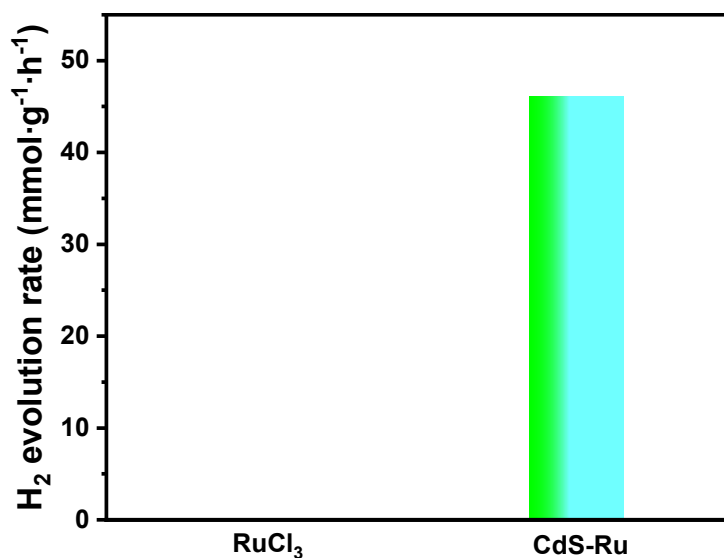

**Fig. S11.** H<sub>2</sub> production of only RuCl<sub>3</sub> and CdS-Ru. Reaction conditions: 2 mg catalyst, 10 mL 2 wt.% hydrazine hydrate, under LED (60 mW cm<sup>-2</sup>,  $\lambda = \lambda > 400$  nm) light.

**Note:** The concentration of Ru<sup>3+</sup> in the RuCl<sub>3</sub> added in the photocatalytic reaction is the same as that in CdS-Ru.

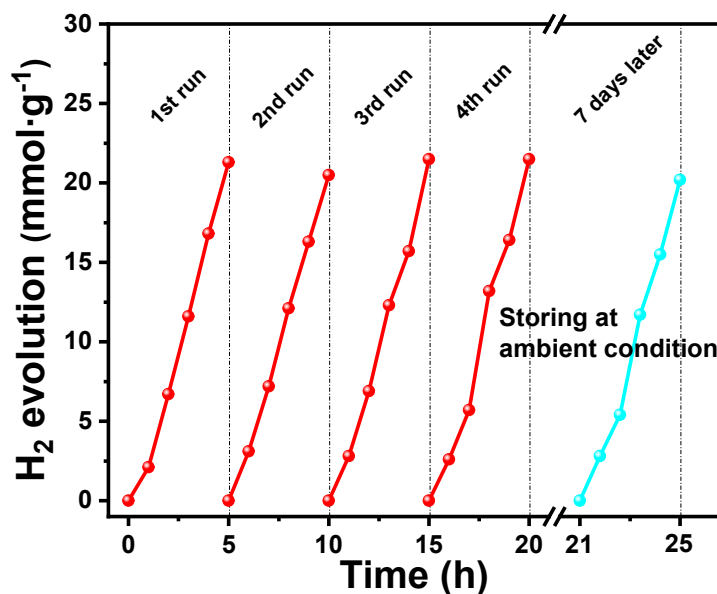

**Fig. S12.** The stability testing of CdS-Ru for photocatalytic H<sub>2</sub> evolution at ambient conditions. Reaction conditions: 2 mg catalyst, 10 mL 2 wt.% hydrazine hydrate, under LED (60 mW cm<sup>-2</sup>,  $\lambda > 400$  nm) light, room temperature, 1 atm, without Ar bubbling.

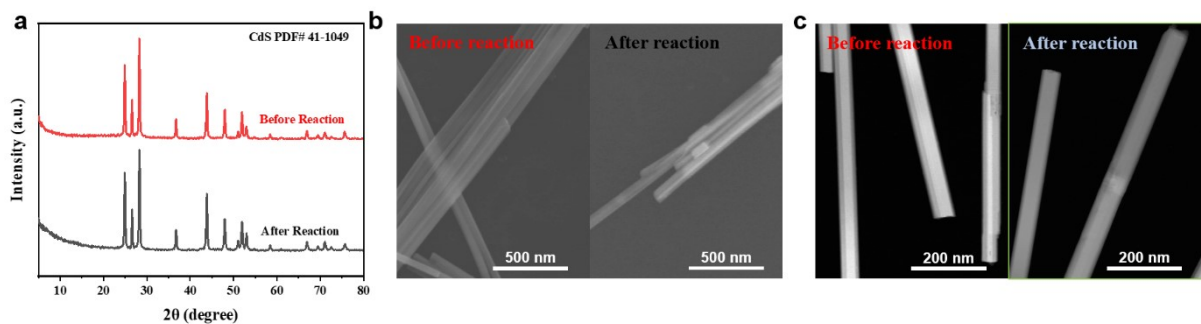

**Fig. S13.** (a) XRD patterns, (b) SEM images and (c) HAADF-STEM images of CdS-Ru before and after reaction.

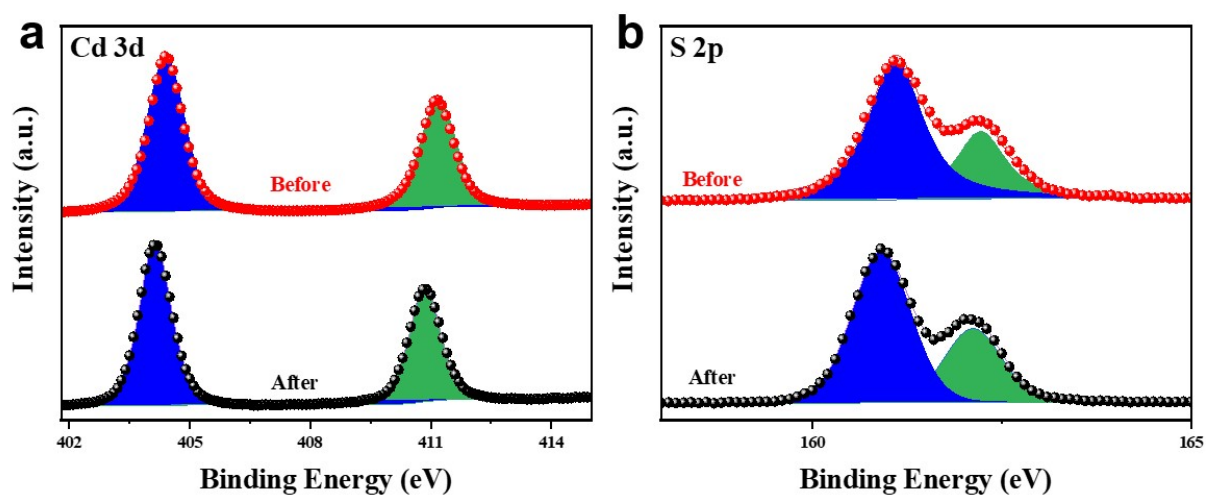

**Fig. S14.** High-resolution XPS spectra of (a) Cd 3d and (b) S 2p for CdS-Ru before and after reaction.

**Note:** In the S 2p XPS spectrum of used CdS-Ru, no redundant miscellaneous peaks related to  $\text{SO}_x^{2-}$  species were observed, indicating the absence of photocorrosion.

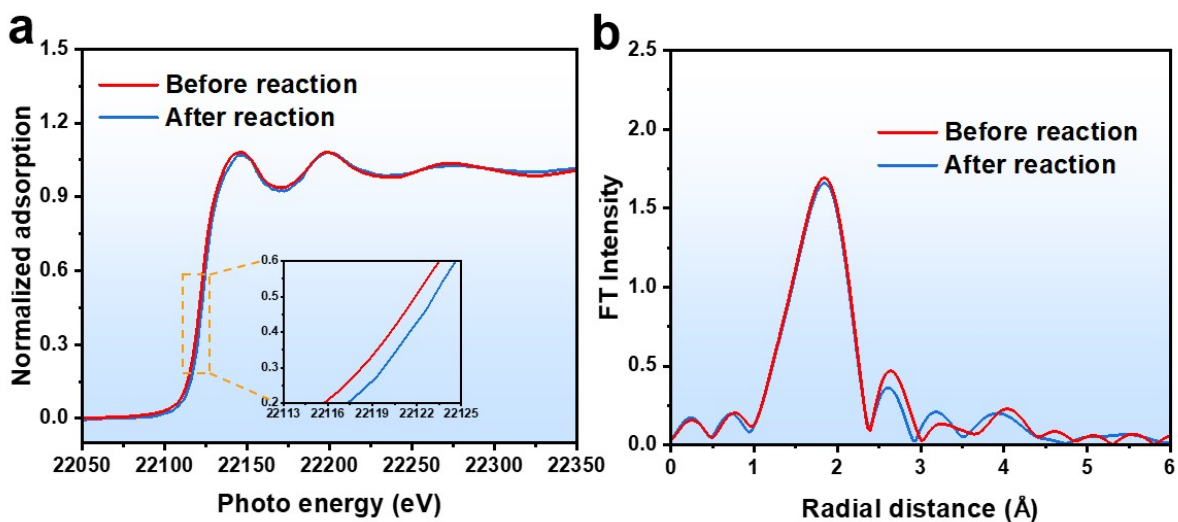

Fig. S15. (a) XANES and (b) EXAFS spectra of CdS-Ru before and after reaction.

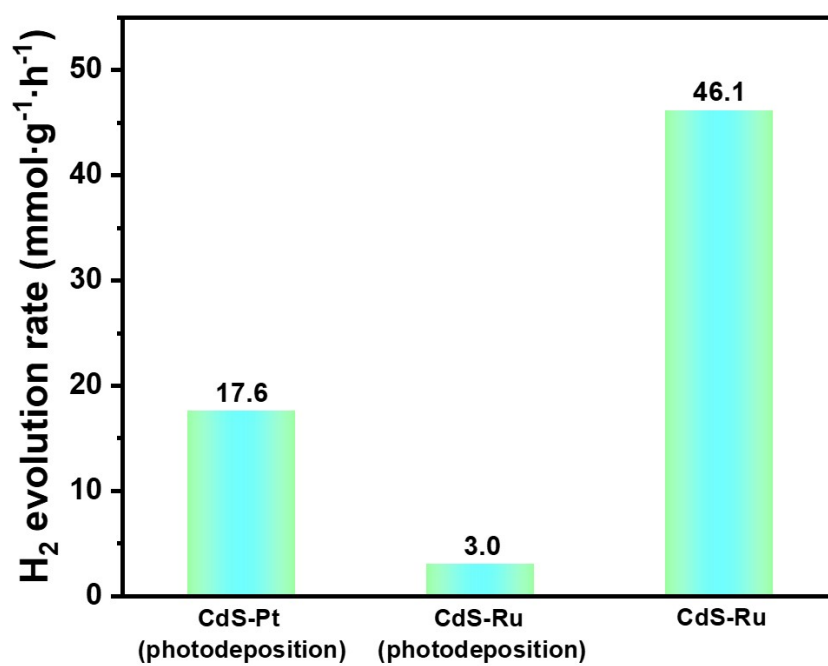

Fig. S16. H<sub>2</sub> production of Pt or Ru photodeposited on CdS and CdS-Ru.

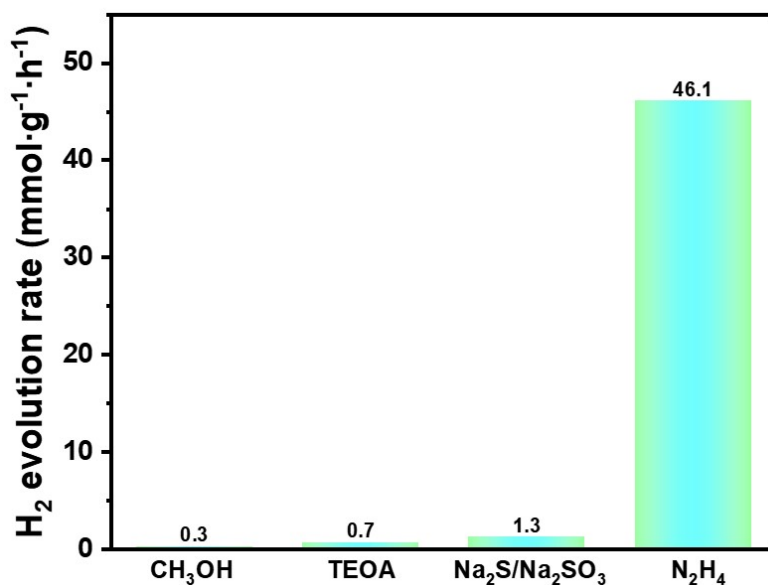

Fig. S17. H<sub>2</sub> production of CdS-Ru under different sacrificial agents.

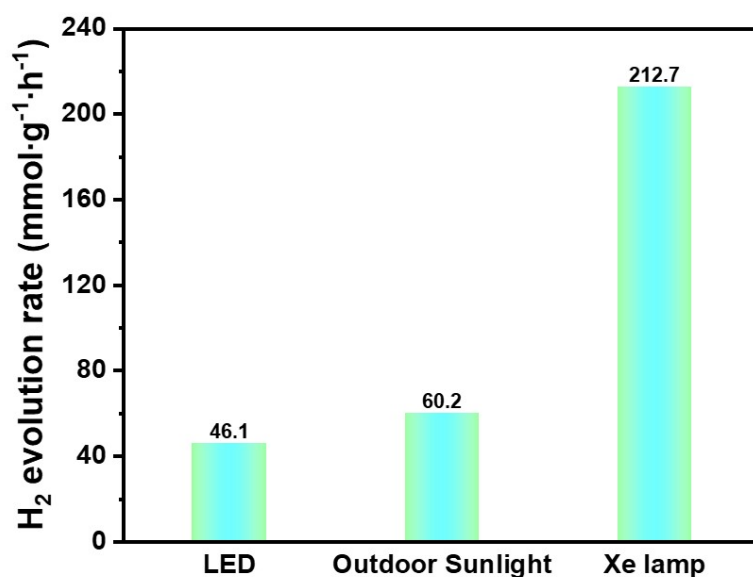

Fig. S18. H<sub>2</sub> production of CdS-Ru under outdoor sunlight, LED ( $\lambda > 400$  nm, 60 mW cm<sup>-2</sup>) lamp or 300 W Xe ( $\lambda > 420$  nm, 200 mW cm<sup>-2</sup>) lamp irradiation.

**Reaction conditions of the outdoor environmental parameter:**

Irradiation time: May 24th, from 1:30 PM to 4:30 PM;

Direct sunlight intensity: 60 mW/cm<sup>2</sup> ;

Outdoor temperature: 32 °C ;

Outdoor humidity: 45% ;

Air pressure: 100.6 kPa.

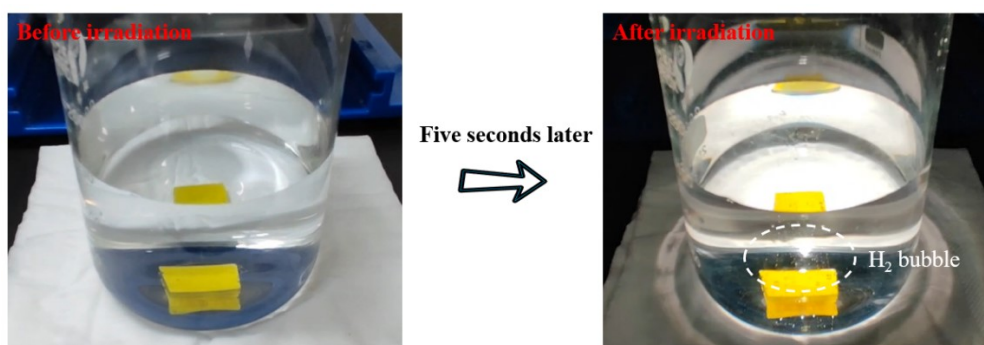

**Fig. S19.** Digital photo of photocatalytic H<sub>2</sub> production over CdS-Ru.

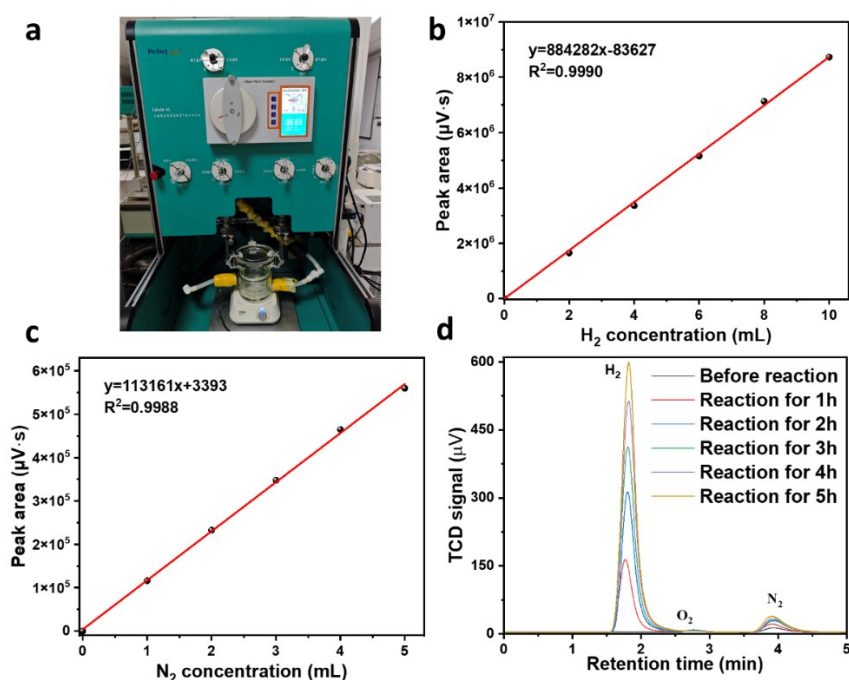

**Fig. S20.** (a) Photography of reaction set-up. Calibration curves for the determination of (b) H<sub>2</sub> and (c) N<sub>2</sub>. (d) Time-dependent TCD signal during the reaction over CdS-Ru.

**Note:** To avoid the interference of O<sub>2</sub> and N<sub>2</sub> in the air, the experiment was performed on a Labsolar 6A all-glass automatic online trace gas analysis system (Beijing Perfect Light Technology Co., LTD., Fig. S19a). The calibration procedure works under the reaction conditions. Typically, 2 mg of catalyst and 10 mL of distilled H<sub>2</sub>O containing 2 wt.% hydrazine hydrate were mixed in a 50 mL reactor. After ultrasonic treatment, connect the reactor to the online trace gas analysis system and vacuum for 10 min. A calibration line was prepared by intermittently sampling 1 mL of the standard N<sub>2</sub> and 2 mL of H<sub>2</sub> through the septum (Fig. S19b and c). The generated gas was analyzed by a GC according to the calibration line. Based on the peak area after reaction of 5 h (Fig. S19d), the N<sub>2</sub> and H<sub>2</sub> productions are respectively 4.82 mL and 10.02 mL. The ratio of produced N<sub>2</sub> to H<sub>2</sub> is determined to be 1:2.08, which is close to the theoretical value of 1:2.

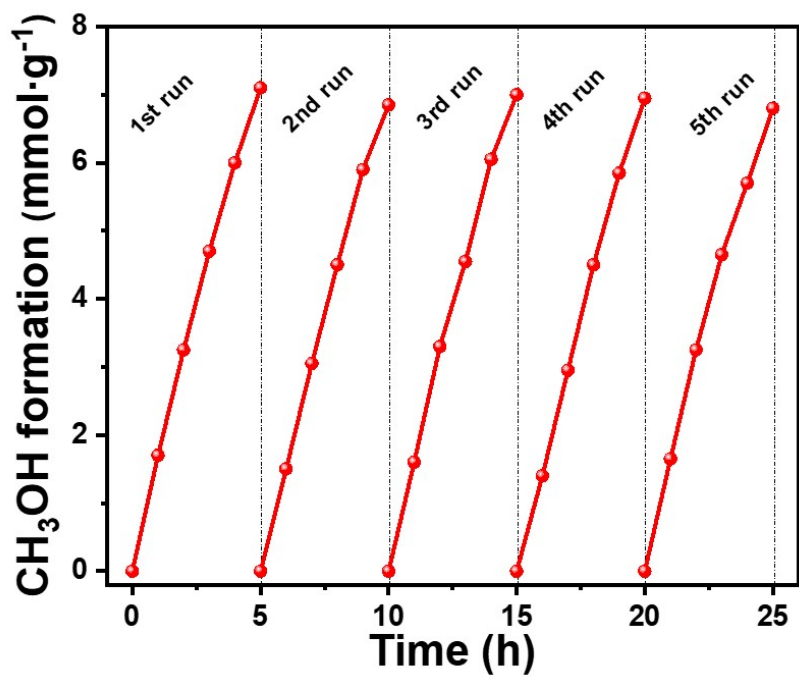

Fig. S21. The stability testing of CdS-Ru for photocatalytic CO<sub>2</sub> reduction to CH<sub>3</sub>OH.

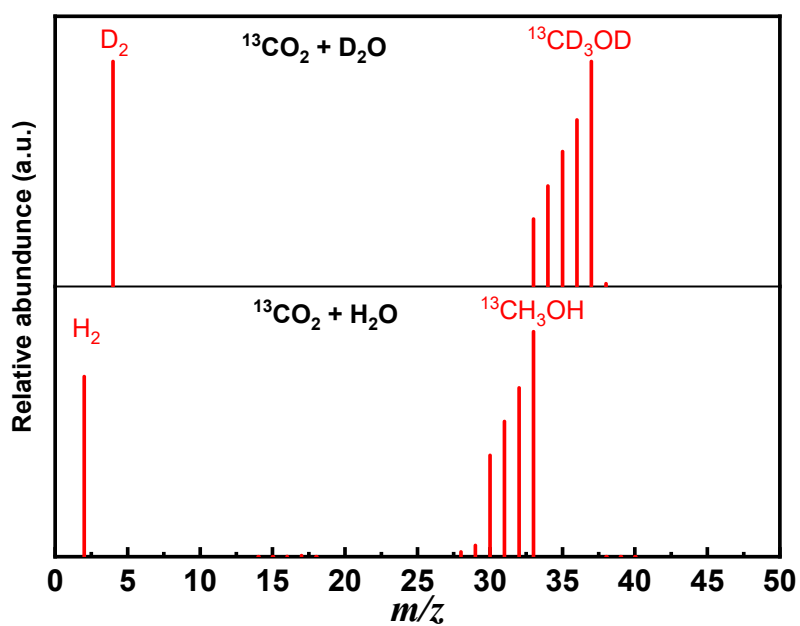

Fig. S22. Mass spectrometry results of the isotope labeling experiments with <sup>13</sup>CO<sub>2</sub> + H<sub>2</sub>O or <sup>13</sup>CO<sub>2</sub> + D<sub>2</sub>O as the reactant.

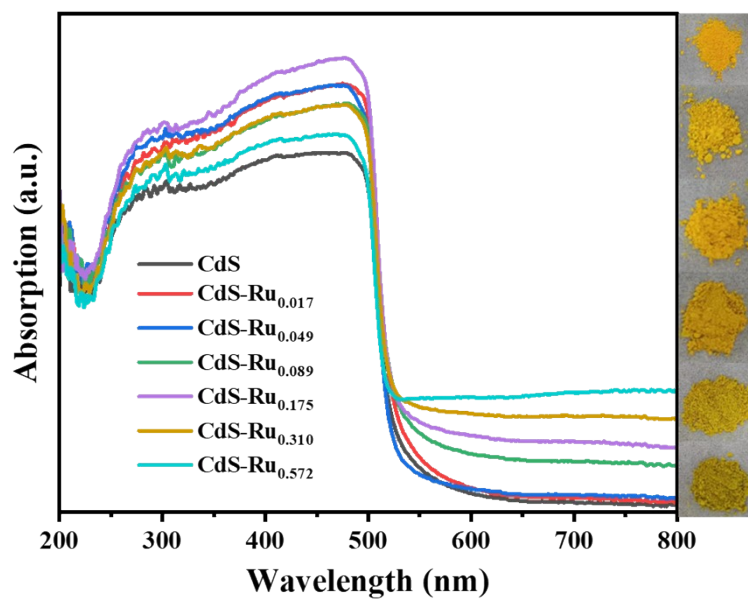

Fig. S23. UV-vis DRS spectra of CdS and CdS-Ru samples and the corresponding photographs.

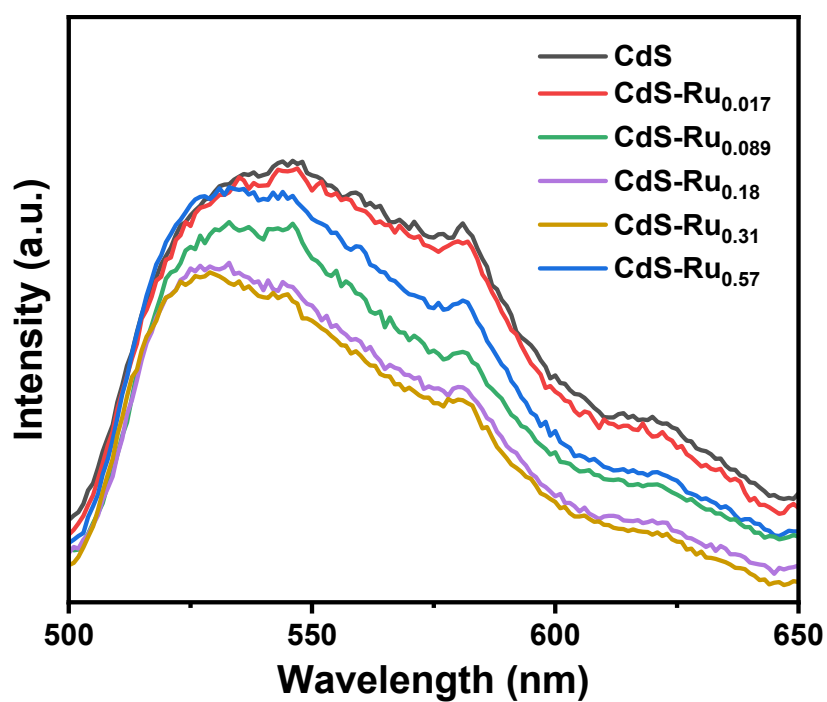

Fig. S24. PL spectra of CdS and CdS-Ru samples.

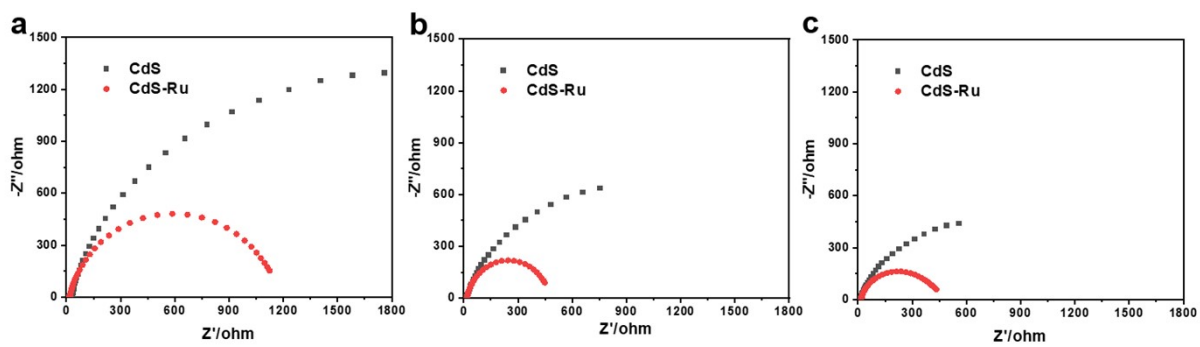

**Fig. S25.** EIS spectra of CdS and CdS-Ru tested at (a) 0.3 V,(b) -0.8 V and (c) -0.9 V.

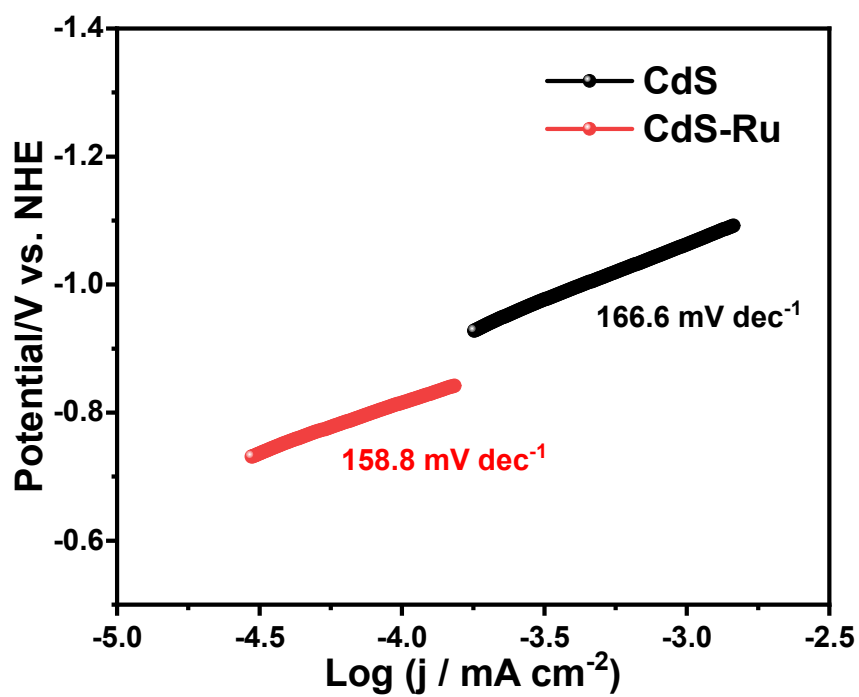

**Fig. S26.** Tafel slope spectra of CdS and CdS-Ru.

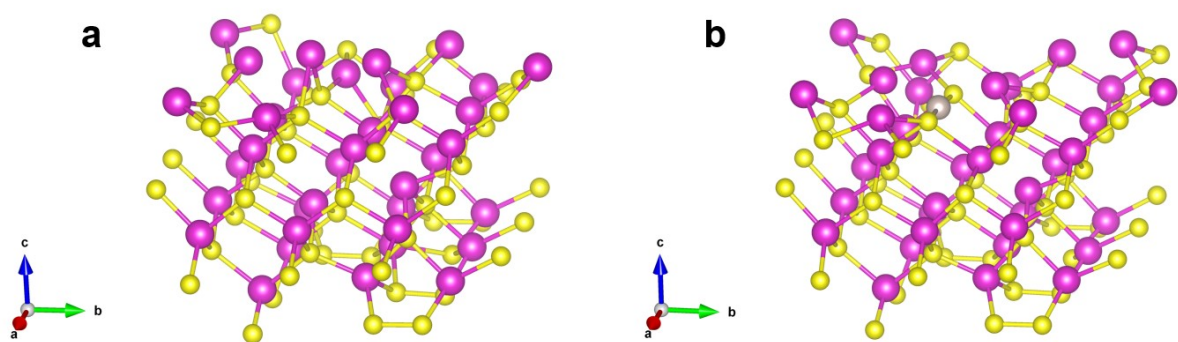

**Fig. S27.** The optimized structures of (a) CdS and (b) CdS-Ru during the DFT calculations.

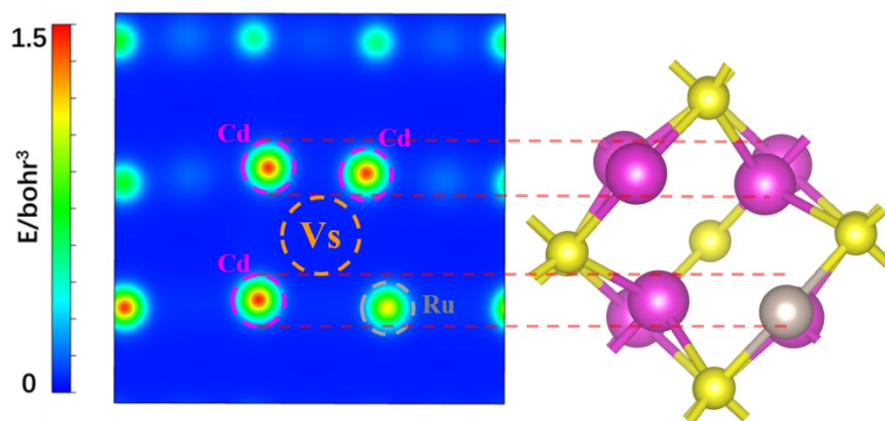

**Fig. S28.** The charge distribution map on the surface of CdS-Ru.

**Note:** It can be seen from Fig. S26 that the charge density of three Cd atoms near the  $V_s$  is increased.

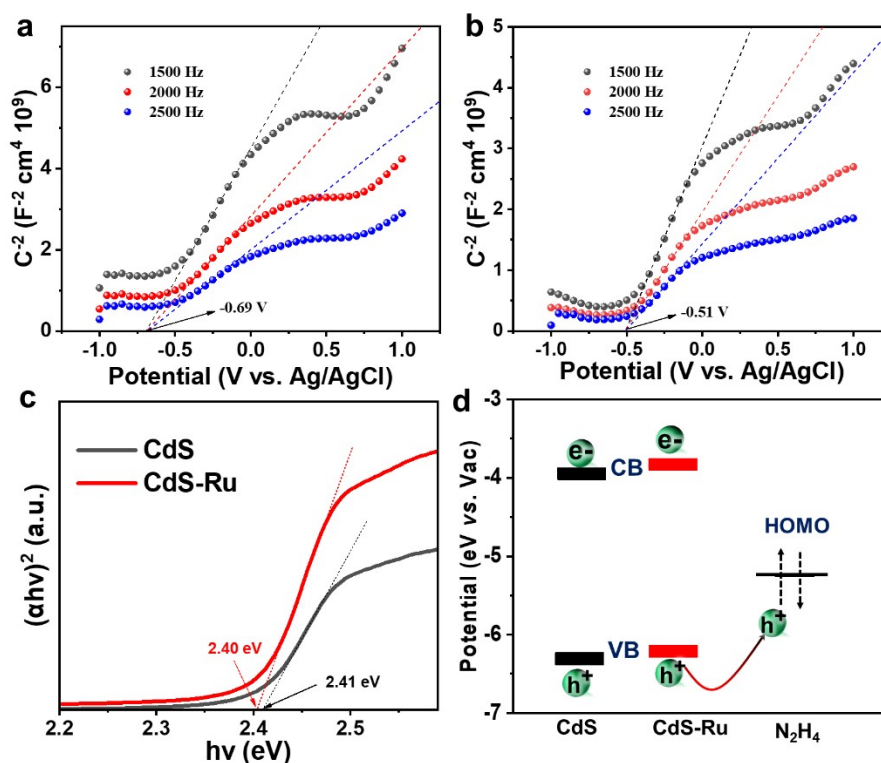

**Fig. S29.** Mott-Schottky plots of (a) CdS and (b) CdS-Ru. (c) Tauc plots of CdS and CdS-Ru. (d) Band diagram of CdS, CdS-Ru and hydrazine.

**Note:** To investigate the band structure, the conduction band (CB) of CdS and CdS-Ru was first estimated by Mott-Schottky plots (Fig. S27a and b). According to the Tauc plots (Fig. S27c), their corresponding band gaps were calculated. Finally, the combination of the above data enables to establish the complete electronic diagrams (Fig. S27d).

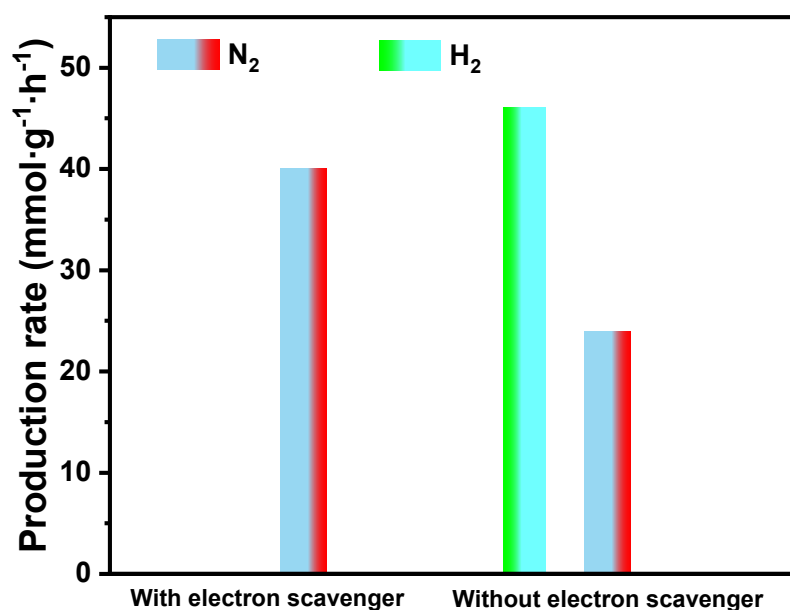

**Fig. S30.**  $\text{H}_2$  production in the presence and absence of an electron scavenger.

**Note:** 1 mmol  $\text{KBrO}_3$  was used as the electron scavenger.

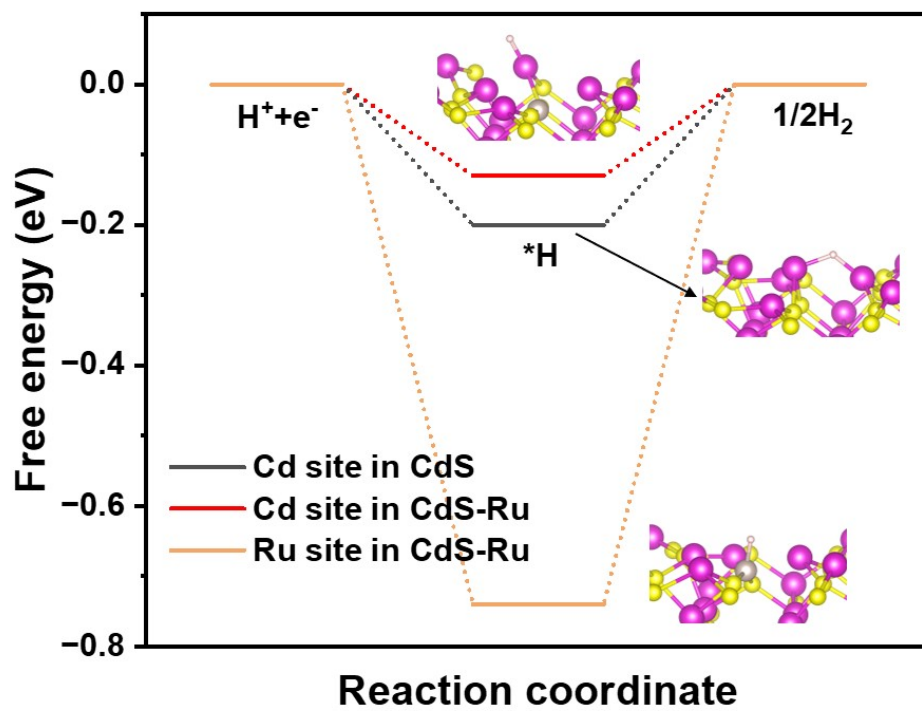

**Fig. S31.** Free energy profiles for the HER at different potential active sites on the CdS and CdS-Ru.

**Table S1.** The actual content of Ru (wt.%) in different samples.

| Added content of RuCl <sub>3</sub> ·3H <sub>2</sub> O (mg) | Actual content of Ru (wt%) | Samples                 |
|------------------------------------------------------------|----------------------------|-------------------------|
| 0.1                                                        | 0.017                      | CdS-Ru <sub>0.017</sub> |
| 1.0                                                        | 0.089                      | CdS-Ru <sub>0.089</sub> |
| 2.0                                                        | 0.18                       | CdS-Ru <sub>0.18</sub>  |
| 4.0                                                        | 0.31                       | CdS-Ru <sub>0.31</sub>  |
| 8.0                                                        | 0.57                       | CdS-Ru <sub>0.57</sub>  |

**Table S2.** Fitting results of EXAFS spectra at Ru K-edge. ( $S_0^2 = 0.85$ )

| Sample | Bond type | CN <sup>a</sup> | R <sup>b</sup> (Å) | $\sigma^2$ (Å <sup>2</sup> ) <sup>c</sup> | R factor <sup>d</sup> |
|--------|-----------|-----------------|--------------------|-------------------------------------------|-----------------------|
| CdS-Ru | Ru-S      | 3.13            | 2.28               | 0.0107                                    | 0.002                 |

**NOTE:** <sup>a</sup> CN: coordination numbers; <sup>b</sup> R: bond distance; <sup>c</sup>  $\sigma^2$ : Debye-Waller factors; <sup>d</sup> R factor: goodness of fitting.

**Table S3.** The actual content of Ru (wt.%) in CdS-Ru<sub>0.18</sub> before and after reaction.

| Sample                 | Actual content of Ru (wt%)<br>before reaction | Actual content of Ru (wt%)<br>after reaction |
|------------------------|-----------------------------------------------|----------------------------------------------|
| CdS-Ru <sub>0.18</sub> | 0.18                                          | 0.18                                         |

**Table S4.** The detailed H<sub>2</sub> evolution experimental conditions of the references cited in Fig. 3d of the main text.

| Catalyst marks                                               | Light source                                                      | Reaction solution                                                   | H <sub>2</sub> yield                       | Ref.      |
|--------------------------------------------------------------|-------------------------------------------------------------------|---------------------------------------------------------------------|--------------------------------------------|-----------|
| 1. CdS/MoO <sub>x</sub>                                      | $\lambda \geq 400$ nm, 300 W Xe lamp                              | 10 vol% lactic acid                                                 | 0.574 mmol g <sup>-1</sup> h <sup>-1</sup> | 7         |
| 2. Sn <sup>2+</sup> /CdS QDs                                 | $\lambda \geq 420$ nm, 350 W Xe lamp                              | glycerol                                                            | 1.61 mmol g <sup>-1</sup> h <sup>-1</sup>  | 8         |
| 3. CdS/GNR                                                   | $\lambda \geq 400$ nm, 300 W Xe lamp                              | 10 vol% lactic acid                                                 | 1.89 mmol g <sup>-1</sup> h <sup>-1</sup>  | 9         |
| 4. CdS/CoS <sub>2</sub>                                      | Full spectrum solar simulator                                     | 20 vol% ascorbic acid                                               | 5.54 mmol g <sup>-1</sup> h <sup>-1</sup>  | 10        |
| 5. BP-Au-CdS                                                 | $\lambda \geq 420$ nm, 300 mW cm <sup>-2</sup>                    | 0.35 M Na <sub>2</sub> S + 0.25 M Na <sub>2</sub> SO <sub>3</sub>   | 8.6 mmol g <sup>-1</sup> h <sup>-1</sup>   | 11        |
| 6. TiO <sub>2</sub> /MoS/CdS                                 | $\lambda \geq 400$ nm, 300 W Xe lamp, 86 mW cm <sup>-2</sup>      | 10 vol% lactic acid                                                 | 8.95 mmol g <sup>-1</sup> h <sup>-1</sup>  | 12        |
| 7. CdS frame-in-cage particles                               | $\lambda \geq 400$ nm, 300 W Xe lamp                              | 0.35 M Na <sub>2</sub> S + 0.25 M Na <sub>2</sub> SO <sub>3</sub>   | 13.6 mmol g <sup>-1</sup> h <sup>-1</sup>  | 13        |
| 8. CdS-Cu <sub>2-x</sub> S/MoS <sub>2</sub>                  | $\lambda \geq 400$ nm, 300 W Xe lamp, 100 mW cm <sup>-2</sup>     | 0.75 M Na <sub>2</sub> S + 1.05 M Na <sub>2</sub> SO <sub>3</sub>   | 14.18 mmol g <sup>-1</sup> h <sup>-1</sup> | 14        |
| 9. NiS/Zn <sub>0.5</sub> Cd <sub>0.5</sub> S                 | $\lambda \geq 420$ nm, 300 W Xe lamp                              | 0.35 M Na <sub>2</sub> S + 0.25 M Na <sub>2</sub> SO <sub>3</sub>   | 16.78 mmol g <sup>-1</sup> h <sup>-1</sup> | 15        |
| 10. Ni/ZCS QDS                                               | $\lambda \geq 420$ nm, 300 W Xe lamp, 80 mW cm <sup>-2</sup>      | 20 vol% TEOA                                                        | 18.87 mmol g <sup>-1</sup> h <sup>-1</sup> | 16        |
| 11. Eu <sub>52</sub> Ni <sub>56-x</sub> Cd <sub>x</sub> /CdS | $\lambda \geq 420$ nm, 300 W Xe lamp, 200 mW cm <sup>-2</sup>     | 0.35 M Na <sub>2</sub> S + 0.25 M Na <sub>2</sub> SO <sub>3</sub>   | 25.35 mmol g <sup>-1</sup> h <sup>-1</sup> | 17        |
| 12. Cd <sub>0.5</sub> Zn <sub>0.5</sub> S@halloysite         | $\lambda \geq 420$ nm, 300 W Xe lamp                              | 0.1 M Na <sub>2</sub> S + 0.1 M Na <sub>2</sub> SO <sub>3</sub>     | 25.67 mmol g <sup>-1</sup> h <sup>-1</sup> | 18        |
| 13. CdS(111)                                                 | $\lambda \geq 420$ nm, 350 W Xe lamp, 40 mW cm <sup>-2</sup>      | 0.35 M Na <sub>2</sub> S + 0.25 M Na <sub>2</sub> SO <sub>3</sub>   | 32.95 mmol g <sup>-1</sup> h <sup>-1</sup> | 19        |
| 14. CdS/CoS <sub>x</sub>                                     | $\lambda \geq 420$ nm, 300 W Xe lamp                              | 0.35 M Na <sub>2</sub> S + 0.25 M Na <sub>2</sub> SO <sub>3</sub>   | 39.2 mmol g <sup>-1</sup> h <sup>-1</sup>  | 20        |
| 15. Sv-CdS                                                   | $\lambda \geq 420$ nm, 300 W Xe lamp, 40 mW cm <sup>-2</sup>      | 0.35 M Na <sub>2</sub> S + 0.25 M Na <sub>2</sub> SO <sub>3</sub>   | 41.73 mmol g <sup>-1</sup> h <sup>-1</sup> | 21        |
| 16. CdS-Ru                                                   | $\lambda \geq 400$ nm, 5 W LED spotlights, 60 mW cm <sup>-2</sup> | 2 vol% N <sub>2</sub> H <sub>4</sub>                                | 46.1 mmol g <sup>-1</sup> h <sup>-1</sup>  | This work |
| 17. Pd@CdS/PdS                                               | $\lambda \geq 400$ nm, 300 W Xe lamp                              | 0.1 M of Na <sub>2</sub> S 0.1 M of Na <sub>2</sub> SO <sub>3</sub> | 144.8 mmol g <sup>-1</sup> h <sup>-1</sup> | 22        |
| 18. Pt <sub>SA</sub> -CdS <sub>IS</sub>                      | 150 W Xenon lamp, 175 mW cm <sup>-2</sup>                         | 0.25 M Na <sub>2</sub> S + 0.35 M Na <sub>2</sub> SO <sub>3</sub>   | 154.7 mmol g <sup>-1</sup> h <sup>-1</sup> | 23        |
| 19. CdS-Ru                                                   | $\lambda \geq 420$ nm, 300 W Xe lamp, 200 mW cm <sup>-2</sup>     | 2 vol% N <sub>2</sub> H <sub>4</sub>                                | 212.7 mmol g <sup>-1</sup> h <sup>-1</sup> | This work |

**Table S5.** The detailed CH<sub>3</sub>OH production experimental conditions of the references cited in Fig. 3d of the main text.

| Photocatalysts                                                                | Light source                                               | Reaction solution                                                         | CH <sub>3</sub> OH yield                   | Ref.      |
|-------------------------------------------------------------------------------|------------------------------------------------------------|---------------------------------------------------------------------------|--------------------------------------------|-----------|
| 22. V-Bi <sub>19</sub> Br <sub>3</sub> S <sub>27</sub>                        | $\lambda > 720$ nm, 300 W Xe lamp                          | H <sub>2</sub> O + CO <sub>2</sub>                                        | 0.4 $\mu\text{mol g}^{-1} \text{h}^{-1}$   | 24        |
| 23. Zn <sub>x</sub> Cd <sub>1-x</sub> S/Au@g-C <sub>3</sub> N <sub>4</sub>    | $\lambda > 420$ nm, 300 W Xe lamp                          | H <sub>2</sub> O + CO <sub>2</sub>                                        | 1.31 $\mu\text{mol g}^{-1} \text{h}^{-1}$  | 25        |
| 24. Cu <sub>2</sub> O-RGO                                                     | 500 W Xe lamp                                              | 0.1 M NaOH + H <sub>2</sub> O + CO <sub>2</sub>                           | 4.15 $\mu\text{mol g}^{-1} \text{h}^{-1}$  | 26        |
| 25. $\alpha$ -Fe <sub>2</sub> O <sub>3</sub> /g-C <sub>3</sub> N <sub>4</sub> | $\lambda > 420$ nm, 300 W Xe lamp                          | H <sub>2</sub> O + CO <sub>2</sub>                                        | 5.63 $\mu\text{mol g}^{-1} \text{h}^{-1}$  | 27        |
| 26. NH <sub>2</sub> -MIL-101(Fe)/CdS/g-C <sub>3</sub> N <sub>4</sub>          | 250 W high-pressure Hg lamp                                | H <sub>2</sub> O + CO <sub>2</sub>                                        | 6.75 $\mu\text{mol g}^{-1} \text{h}^{-1}$  | 28        |
| 27. Zn <sub>0.2</sub> Cd <sub>0.8</sub> S/g-C <sub>3</sub> N <sub>4</sub>     | $\lambda > 420$ nm, 300 W Xe lamp, 100 mW cm <sup>-2</sup> | H <sub>2</sub> O + CO <sub>2</sub>                                        | 11.5 $\mu\text{mol g}^{-1} \text{h}^{-1}$  | 29        |
| 28. mCD/CN                                                                    | 300 W Xe lamp, 100 mW cm <sup>-2</sup>                     | H <sub>2</sub> O + CO <sub>2</sub>                                        | 13.9 $\mu\text{mol g}^{-1} \text{h}^{-1}$  | 30        |
| 29. UiO-66-NH <sub>2</sub>                                                    | $\lambda > 420$ nm, 300 W Xe lamp                          | 0.1 M NaHCO <sub>3</sub> + H <sub>2</sub> O + CO <sub>2</sub>             | 34.83 $\mu\text{mol g}^{-1} \text{h}^{-1}$ | 31        |
| 30. Cu-In <sub>2</sub> O <sub>3</sub> /TiO <sub>2</sub>                       | $\lambda < 365$ nm, 500 W Xe lamp, 25 mW cm <sup>-2</sup>  | H <sub>2</sub> O + H <sub>2</sub> + CO <sub>2</sub>                       | 35 $\mu\text{mol g}^{-1} \text{h}^{-1}$    | 32        |
| 31. rGO-CuO                                                                   | 20 W white LED                                             | DMF + H <sub>2</sub> O + CO <sub>2</sub>                                  | 53.42 $\mu\text{mol g}^{-1} \text{h}^{-1}$ | 33        |
| 32. GO-3                                                                      | 300 W halogen lamp                                         | H <sub>2</sub> O + CO <sub>2</sub>                                        | 172 $\mu\text{mol g}^{-1} \text{h}^{-1}$   | 34        |
| 33. Co/g-C <sub>3</sub> N <sub>4</sub> -0.2                                   | 300 W Xe lamp, 700 mW cm <sup>-2</sup>                     | H <sub>2</sub> O + CO <sub>2</sub>                                        | 235.5 $\mu\text{mol g}^{-1} \text{h}^{-1}$ | 35        |
| 34. RuSA-mC <sub>3</sub> N <sub>4</sub>                                       | Blue LED Light, 22 mW cm <sup>-2</sup>                     | DMF + H <sub>2</sub> O + CO <sub>2</sub>                                  | 250 $\mu\text{mol g}^{-1} \text{h}^{-1}$   | 36        |
| 35. g-C <sub>3</sub> N <sub>4</sub> /CuO @MIL-125(Ti)                         | 300 W Xe lamp, 32.6 mW cm <sup>-2</sup>                    | H <sub>2</sub> O + CO <sub>2</sub>                                        | 332.4 $\mu\text{mol g}^{-1} \text{h}^{-1}$ | 37        |
| 36. N-In <sub>2</sub> O <sub>3</sub>                                          | 300 W Xe lamp                                              | 10 vol% TEOA + H <sub>2</sub> O + CO <sub>2</sub>                         | 394 $\mu\text{mol g}^{-1} \text{h}^{-1}$   | 38        |
| 37. NH <sub>2</sub> -MIL-125(Ti)                                              | 20 W white LED lamp                                        | 10 vol% TEOA + CH <sub>3</sub> CN + H <sub>2</sub> O + CO <sub>2</sub>    | 1.97 mmol g <sup>-1</sup> h <sup>-1</sup>  | 39        |
| 38. Au@ZIF-67                                                                 | 150 mW cm <sup>-2</sup> , Solar simulator                  | 10 vol% TEOA + NaHCO <sub>3</sub> + H <sub>2</sub> O + CO <sub>2</sub>    | 2.5 mmol g <sup>-1</sup> h <sup>-1</sup>   | 40        |
| 39. CdS-Ru                                                                    | $\lambda > 420$ nm, 300 W Xe lamp, 200 mW cm <sup>-2</sup> | 2 wt.% N <sub>2</sub> H <sub>4</sub> + H <sub>2</sub> O + CO <sub>2</sub> | 1.4 mmol g <sup>-1</sup> h <sup>-1</sup>   | This work |

**Table S6.** Transient current decay analysis for different samples.

| Samples | A <sub>1</sub> (%) | τ <sub>1</sub> (ns) | A <sub>2</sub> (%) | τ <sub>2</sub> (ns) | τ <sub>A</sub> (ns) |
|---------|--------------------|---------------------|--------------------|---------------------|---------------------|
| CdS     | 57.8               | 0.18                | 41.1               | 2.89                | 1.51                |
| CdS-Ru  | 34.0               | 0.14                | 64.6               | 2.78                | 2.71                |

**Note:** The data fitting of TR-PL uses the following equations:

$$I(t) = A_1 \exp(-t/\tau_1) + A_2 \exp(-t/\tau_2) \quad (1)$$

$$\tau_A = \frac{A_1 \tau_1^2 + A_2 \tau_2^2}{A_1 \tau_1 + A_2 \tau_2} \quad (2)$$

**Table S7.** Spin concentration per unit volume in EPR measurements.

| Samples | Spin concentration per unit volume (spins/mm <sup>3</sup> ) |
|---------|-------------------------------------------------------------|
| CdS     | 2.4 × 10 <sup>12</sup>                                      |
| CdS-Ru  | 7.3 × 10 <sup>12</sup>                                      |

**Equations S1-S6.**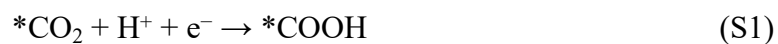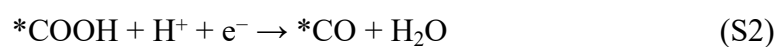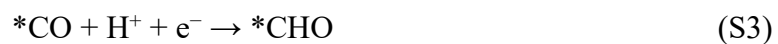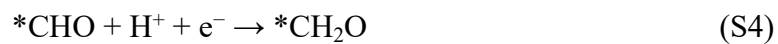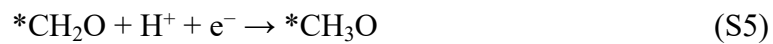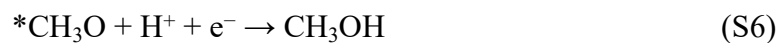

## References

1. T. H. Chiang, H. Lyu, T. Hisatomi, Y. Goto, T. Takata, M. Katayama, T. Minegishi and K. Domen, *ACS Catal.*, 2018, **8**, 2782-2788.
2. G. Kresse and J. Furthmüller, *Comput. Mater. Sci.*, 1996, **6**, 15-50.
3. G. Kresse and J. Furthmüller, *Phys. Rev. B*, 1996, **54**, 11169-11186.
4. J. P. Perdew, K. Burke and M. Ernzerhof, *Phys. Rev. Lett.*, 1996, **77**, 3865.
5. J. P. Perdew, M. Ernzerhof and K. Burke, *J. Chem. Phys.*, 1996, **105**, 9982-9985.
6. S. Grimme, *J. Comput. Chem.*, 2006, **27**, 1787-1799.
7. H. Zhang, P. Zhang, M. Qiu, J. Dong, Y. Zhang and X. W. Lou, *Adv. Mater.*, 2019, **31**, 1804883.
8. X. Xiang, B. Zhu, B. Cheng, J. Yu and H. Lv, *Small*, 2020, **16**, 2001024.
9. Y. Xia, B. Cheng, J. Fan, J. Yu and G. Liu, *Small*, 2019, **15**, 1902459.
10. P. Wang, Y. Mao, L. Li, Z. Shen, X. Luo, K. Wu, P. An, H. Wang, L. Su and Y. Li, *Angew. Chem. Int. Ed.*, 2019, **58**, 11329-11334.
11. X. Cai, L. Mao, S. Yang, K. Han and J. Zhang, *ACS Energy Lett.*, 2018, **3**, 932-939.
12. B. Sun, W. Zhou, H. Li, L. Ren, P. Qiao, W. Li and H. Fu, *Adv. Mater.*, 2018, **30**, 1804282.
13. P. Zhang, D. Luan and X. W. Lou, *Adv. Mater.*, 2020, **32**, 2004561.
14. G. Liu, C. Kolodziej, R. Jin, S. Qi, Y. Lou, J. Chen, D. Jiang, Y. Zhao and C. Burda, *ACS nano*, 2020, **14**, 5468-5479.
15. X. Zhao, J. Feng, J. Liu, W. Shi, G. Yang, G. C. Wang and P. Cheng, *Angew. Chem. Int. Ed.*, 2018, **130**, 9938-9942.
16. D. Su, J. Ran, Z. Zhuang, C. Chen, S. Qiao, Y. Li and G. Wang, *Sci. Adv.*, 2020, **6**, eaaz8447.
17. R. Chen, Z. H. Yan, X. J. Kong, L. S. Long and L. S. Zheng, *Angew. Chem. Int. Ed.*, 2018, **57**, 16796-16800.
18. S. Lin, Y. Zhang, Y. You, C. Zeng, X. Xiao, T. Ma and H. Huang, *Adv. Funct. Mater.*, 2019, **29**, 1903825.
19. Y. Zhao, C. Shao, Z. Lin, S. Jiang and S. Song, *Small*, 2020, **16**, 2000944.
20. X. Zhang, H. Liang, H. Li, Y. Xia, X. Zhu, L. Peng, W. Zhang, L. Liu, T. Zhao and C. Wang, *Angew. Chem. Int. Ed.*, 2020, **132**, 3313-3319.
21. J. He, L. Hu, C. Shao, S. Jiang, C. Sun and S. Song, *ACS nano*, 2021, **15**, 18006-18013.
22. Q. Sun, N. Wang, J. Yu and J. C. Yu, *Adv. Mater.*, 2018, **30**, 1804368.
23. P. Sharma, M. Sharma, M. Dearg, M. Wilding, T. J. Slater and C. R. A. Catlow, *Angew. Chem. Int. Ed.*, 2023, **135**, e202301239.

24. J. Li, W. Pan, Q. Liu, Z. Chen, Z. Chen, X. Feng and H. Chen, *J. Am. Chem. Soc.*, 2021, **143**, 6551-6559.
25. P. Madhusudan, R. Shi, S. Xiang, M. Jin, B. N. Chandrashekar, J. Wang, W. Wang, O. Peng, A. Amini and C. Cheng, *Appl. Catal. B-Environ.*, 2021, **282**, 119600.
26. A. Wang, X. Li, Y. Zhao, W. Wu, J. Chen and H. Meng, *Powder Technol.*, 2014, **261**, 42-48.
27. H. Guo, M. Chen, Q. Zhong, Y. Wang, W. Ma and J. Ding, *J. CO<sub>2</sub> Util.*, 2019, **33**, 233-241.
28. R. Manna, G. Bhattacharya, P. Sardar, S. Raj, A. Jain and A. N. Samanta, *Chem. Eng. Sci.*, 2024, **288**, 119811.
29. H. Guo, J. Ding, S. Wan, Y. Wang and Q. Zhong, *Appl. Surf. Sci.*, 2020, **528**, 146943.
30. Y. Wang, X. Liu, X. Han, R. Godin, J. Chen, W. Zhou, C. Jiang, J. F. Thompson, K. B. Mustafa and S. A. Shevlin, *Nat. Commun.*, 2020, **11**, 2531.
31. J. Meng, Q. Chen, J. Lu and H. Liu, *ACS Appl. Mater. Interfaces*, 2018, **11**, 550-562.
32. M. Tahir, B. Tahir, N. A. S. Amin and H. Alias, *Appl. Surf. Sci.*, 2016, **389**, 46-55.
33. R. Gusain, P. Kumar, O. P. Sharma, S. L. Jain and O. P. Khatri, *Appl. Catal. B-Environ.*, 2016, **181**, 352-362.
34. H.-C. Hsu, I. Shown, H.-Y. Wei, Y.-C. Chang, H.-Y. Du, Y.-G. Lin, C.-A. Tseng, C.-H. Wang, L.-C. Chen and Y.-C. Lin, *Nanoscale*, 2013, **5**, 262-268.
35. M. Ma, Z. Huang, D. E. Doronkin, W. Fa, Z. Rao, Y. Zou, R. Wang, Y. Zhong, Y. Cao and R. Zhang, *Appl. Catal. B-Environ.*, 2022, **300**, 120695.
36. P. Sharma, S. Kumar, O. Tomanec, M. Petr, J. Zhu Chen, J. T. Miller, R. S. Varma, M. B. Gawande and R. Zbořil, *Small*, 2021, **17**, 2006478.
37. N. Li, X. Liu, J. Zhou, W. Chen and M. Liu, *Chem. Eng. J.*, 2020, **399**, 125782.
38. Y. Yang, Y.-X. Pan, X. Tu and C.-j. Liu, *Nano Energy*, 2022, **101**, 107613.
39. J. O. Olowoyo, U. Saini, M. Kumar, H. Valdes, H. Singh, M. O. Omorogie, J. O. Babalola, A. V. Vorontsov, U. Kumar and P. G. Smirniotis, *J. CO<sub>2</sub> Util.*, 2020, **42**, 101300.
40. J. Becerra, D.-T. Nguyen, V.-N. Gopalakrishnan and T.-O. Do, *ACS Appl. Energy Mater.*, 2020, **3**, 7659-7665.
